# Supplementary material for: Human adipose-derived mesenchymal stem cells for acute and sub-acute TBI
Source: PubMed Central journal article supplement (PMC7250455; doi:10.1371/journal.pone.0233263), 2020-05-26
Supplement: pone.0233263.s001.pdf [file pone.0233263.s001.pdf]

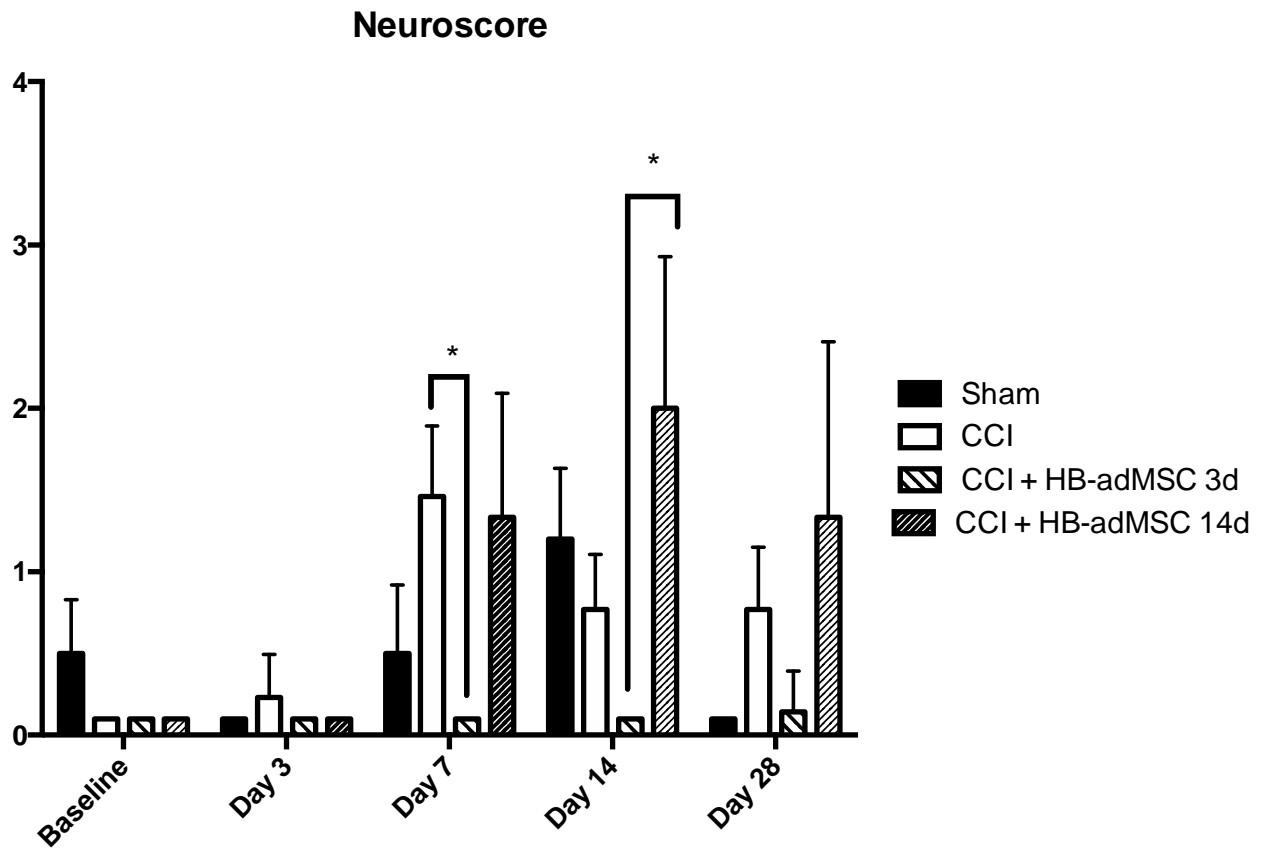

**Supplemental Fig 1. Short Neurological Assessment** There is a significant decrease in neuroscore on day 7 in animals treated at 3d when compared to injured controls. Data represent mean scores  $\pm$  SEM. Statistical analysis performed by Two-way ANOVA with Tukey's post hoc test. (\*,  $p < 0.05$ ). Sham,  $n = 10$ , CCI + PBS,  $n = 13$ , CCI + HB-adMSCs 3d,  $n = 7$ , CCI + HB-adMSCs 14d,  $n = 3$ .
