# Supplementary material for: Human adipose-derived mesenchymal stem cells for acute and sub-acute TBI
Source: PubMed Central journal article supplement (PMC7250455; doi:10.1371/journal.pone.0233263), 2020-05-26
Supplement: pone.0233263.s002.pdf [file pone.0233263.s002.pdf]

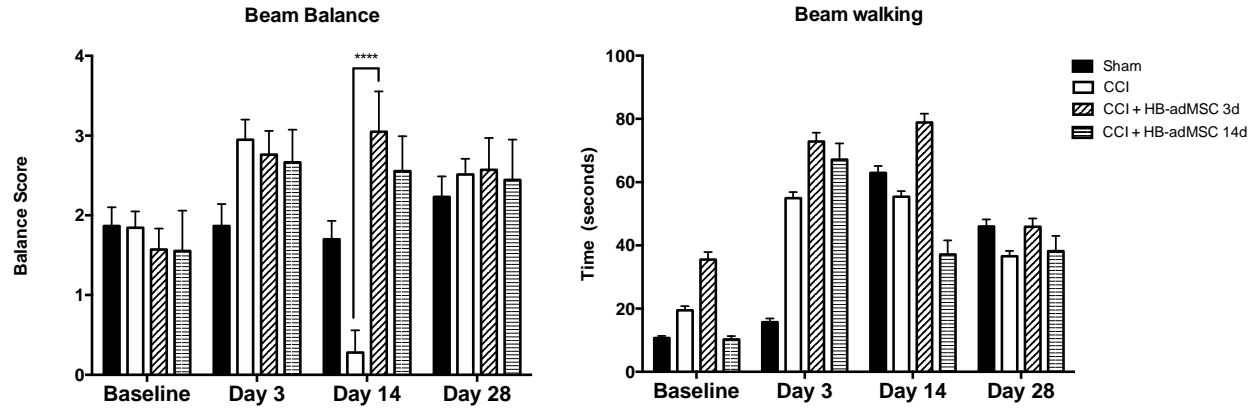

### Supplemental Fig 2. Beam Balance and Walking

Beam balance results indicate a significant improvement in CCI + HB-adMSCs 3d animals at Day 14 compared to injured controls (\*\*\*\*,  $p$  value < 0.0001). No significant difference was seen in beam walking measurements. Values represent means  $\pm$  SEM. Statistical analysis performed by Two-way ANOVA. Sham,  $n=10$ , CCI + PBS,  $n=13$ , CCI + HB-adMSCs 3d,  $n=7$ , CCI + HB-adMSCs 14d,  $n=3$ .
