# Supplementary material for: Human adipose-derived mesenchymal stem cells for acute and sub-acute TBI
Source: PubMed Central journal article supplement (PMC7250455; doi:10.1371/journal.pone.0233263), 2020-05-26
Supplement: pone.0233263.s003.pdf [file pone.0233263.s003.pdf]

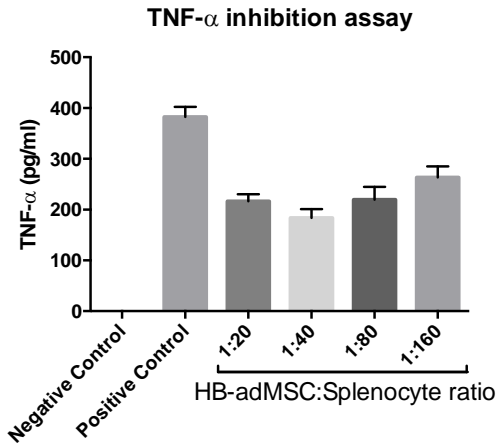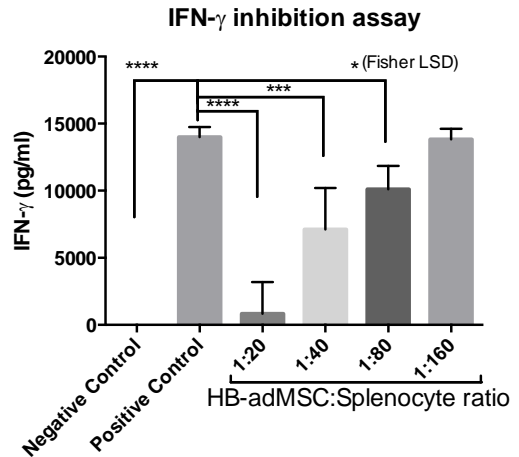

### PGE<sub>2</sub> production from LPS-stimulated co-cultures

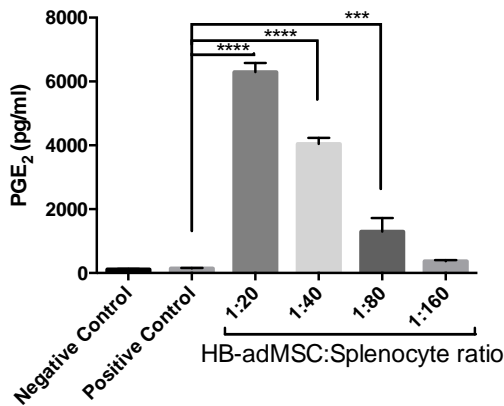

### Fold Change vs. Resting HB-adMSC ΔΔCt (stdev)

|       | COX-2       | IDO            | TSG-6       | IL-1ra       |
|-------|-------------|----------------|-------------|--------------|
| TNF-α | 2.58 (0.16) | 2.53 (0.17)    | 4.19 (0.10) | 27.97 (0.11) |
| IFN-γ | 1.41 (0.24) | 3110.34 (0.15) | 1.81 (0.08) | 0.50 (0.07)  |

### Supplemental Fig 3. *In Vitro* HB-adMSC Analysis

HB-adMSCs reduce the secretion of TNF-α and IFN-γ from LPS or concanavalin A stimulated rat splenocyte co-cultures in a dose-dependent fashion (top left and top right, respectively). This reduction in TNF-α was accompanied by an inverse relationship between the number of HB-adMSC in the co-cultures and PGE<sub>2</sub> (bottom left). Quantitative PCR detected an increase in several possible mechanisms of immune modulation when HB-adMSC were stimulated with either TNF-α or IFN-γ (50ng/ml each, bottom right). Values represent means ± SD. \*, p value <0.05; \*\*\*, p value <0.001; \*\*\*\*, p value <0.0001. Statistical analysis performed by One-way ANOVA with multiple comparison Sidak's test or Fisher's LSD, as noted.
