# Supplementary material for: Human adipose-derived mesenchymal stem cells for acute and sub-acute TBI
Source: PubMed Central journal article supplement (PMC7250455; doi:10.1371/journal.pone.0233263), 2020-05-26
Supplement: pone.0233263.s004.pdf [file pone.0233263.s004.pdf]

| Donor          | passage | Positive |        |        |        | Negative |       |         |       |
|----------------|---------|----------|--------|--------|--------|----------|-------|---------|-------|
|                |         | CD73+    | CD90+  | CD44   | CD29   | CD34+    | CD45+ | HLA DR+ | CD31  |
| <b>A</b>       | 2       | 97.984   | 96.938 | 80.088 | 99.354 | 0        | 0     | 0.037   | 0     |
|                | 4       | 98.644   | 76.441 | 98.552 | 99.749 | 0.017    | 0     | 0       | 0.023 |
|                | 8       | 96.692   | 71.554 | 83.539 | 95.91  | 0        | 0.031 | 0.031   | 0.112 |
|                | 12      | 84.944   | 71.19  | 87.349 | 95.783 | 0        | 0     | 0.186   | 0.151 |
| <b>B</b>       | 2       | 98.175   | 94.681 | 82.497 | 99.278 | 0        | 0     | 0.024   | 0.01  |
|                | 4       | 98.703   | 82.248 | 98.087 | 99.854 | 0.027    | 0.027 | 0.027   | 0     |
|                | 8       | 99.21    | 97.315 | 90.492 | 99.48  | 0        | 0     | 0.053   | 0.062 |
|                | 12      | 89.242   | 88.143 | 86.945 | 99.104 | 0.058    | 0     | 0.058   | 0.195 |
| <b>C</b>       | 2       | 96.225   | 88.88  | 74.748 | 99.711 | 0.011    | 0.023 | 0.046   | 0     |
|                | 4       | 99.404   | 74.348 | 97.946 | 99.893 | 0.012    | 0.012 | 0       | 0     |
|                | 8       | 98.989   | 80.699 | 89.333 | 99.625 | 0.013    | 0     | 0.026   | 0.08  |
|                | 12      | 92.078   | 68.909 | 77.62  | 96.601 | 0        | 0.149 | 0       | 0.85  |
| <b>D</b>       | 2       | 98.451   | 94.218 | 85.797 | 99.856 | 0.018    | 0.018 | 0.036   | 0     |
|                | 4       | 99.68    | 71.383 | 98.499 | 99.83  | 0        | 0     | 0       | 0.032 |
|                | 8       | 98.932   | 87.315 | 95.554 | 99.431 | 0.013    | 0     | 0.027   | 0.032 |
|                | 12      | 78.415   | 75.137 | 87.94  | 98.151 | 0        | 0.546 | 0       | 0.616 |
| <b>Control</b> | 8       | 96.855   | 93.711 | 82.535 | 98.642 | 0        | 0     | 0.21    | 0.197 |
|                | 12      | 99.146   | 98.719 | 79.906 | 98.823 | 0.107    | 0.534 | 1.387   | 0.157 |

**Supplemental Table S1. *In Vitro* HB-adMSC Analysis**

HB-adMSC have characteristic traits consistent with conventional MSC, including a phenotype negative for CD31, CD34, CD45, and HLA-DR and positive for CD29, CD44, CD73, and CD90. Value is expressed as a percentage.
