# Supplementary material for: Human adipose-derived mesenchymal stem cells for acute and sub-acute TBI
Source: PubMed Central journal article supplement (PMC7250455; doi:10.1371/journal.pone.0233263), 2020-05-26
Supplement: pone.0233263.s005.pdf [file pone.0233263.s005.pdf]

**Supplemental Table S2. Full statistical comparisons between treatment groups.** Complete statistical comparisons between all the groups presented in **Figure 4**.

| %CD32                                    |            |                    |              |         |
|------------------------------------------|------------|--------------------|--------------|---------|
| Number of families                       | 2          |                    |              |         |
| Number of comparisons per family         | 6          |                    |              |         |
| Alpha                                    | 0.05       |                    |              |         |
|                                          |            |                    |              |         |
| Tukey's multiple comparisons test        | Mean Diff. | 95% CI of diff.    | Significant? | Summary |
|                                          |            |                    |              |         |
| Ipsilateral                              |            |                    |              |         |
| Sham + Vehicle vs. CCI + Vehicle         | -2.072     | -3.995 to -0.1495  | Yes          | *       |
| Sham + Vehicle vs. CCI + HB-adMSC 3d     | -2.386     | -4.741 to -0.03122 | Yes          | *       |
| Sham + Vehicle vs. CCI + HB-adMSC 14d    | 0.9693     | -2.071 to 4.009    | No           | ns      |
| CCI + Vehicle vs. CCI + HB-adMSC 3d      | -0.3138    | -2.669 to 2.041    | No           | ns      |
| CCI + Vehicle vs. CCI + HB-adMSC 14d     | 3.042      | 0.001430 to 6.082  | Yes          | *       |
| CCI + HB-adMSC 3d vs. CCI + HB-adMSC 14d | 3.355      | 0.02509 to 6.686   | Yes          | *       |
|                                          |            |                    |              |         |
| Contralateral                            |            |                    |              |         |
| Sham + Vehicle vs. CCI + Vehicle         | -0.5685    | -2.491 to 1.354    | No           | ns      |
| Sham + Vehicle vs. CCI + HB-adMSC 3d     | -2.918     | -5.273 to -0.5628  | Yes          | *       |
| Sham + Vehicle vs. CCI + HB-adMSC 14d    | 2.846      | -0.1944 to 5.886   | No           | ns      |
| CCI + Vehicle vs. CCI + HB-adMSC 3d      | -2.349     | -4.704 to 0.005672 | No           | ns      |
| CCI + Vehicle vs. CCI + HB-adMSC 14d     | 3.414      | 0.3741 to 6.454    | Yes          | *       |
| CCI + HB-adMSC 3d vs. CCI + HB-adMSC 14d | 5.763      | 2.433 to 9.094     | Yes          | ***     |

| %CD86                                    |            |                  |              |         |
|------------------------------------------|------------|------------------|--------------|---------|
| Number of families                       | 2          |                  |              |         |
| Number of comparisons per family         | 6          |                  |              |         |
| Alpha                                    | 0.05       |                  |              |         |
|                                          |            |                  |              |         |
| Tukey's multiple comparisons test        | Mean Diff. | 95% CI of diff.  | Significant? | Summary |
|                                          |            |                  |              |         |
| Ipsilateral                              |            |                  |              |         |
| Sham + Vehicle vs. CCI + Vehicle         | -19.71     | -26.23 to -13.18 | Yes          | ****    |
| Sham + Vehicle vs. CCI + HB-adMSC 3d     | 1.434      | -6.556 to 9.423  | No           | ns      |
| Sham + Vehicle vs. CCI + HB-adMSC 14d    | -31.78     | -42.09 to -21.47 | Yes          | ****    |
| CCI + Vehicle vs. CCI + HB-adMSC 3d      | 21.14      | 13.15 to 29.13   | Yes          | ****    |
| CCI + Vehicle vs. CCI + HB-adMSC 14d     | -12.07     | -22.39 to -1.758 | Yes          | *       |
| CCI + HB-adMSC 3d vs. CCI + HB-adMSC 14d | -33.21     | -44.51 to -21.91 | Yes          | ****    |
|                                          |            |                  |              |         |
| Contralateral                            |            |                  |              |         |
| Sham + Vehicle vs. CCI + Vehicle         | -16.86     | -23.38 to -10.34 | Yes          | ****    |

|                                          |        |                  |     |      |
|------------------------------------------|--------|------------------|-----|------|
| Sham + Vehicle vs. CCI + HB-adMSC 3d     | -3.405 | -11.39 to 4.585  | No  | ns   |
| Sham + Vehicle vs. CCI + HB-adMSC 14d    | -23.7  | -34.02 to -13.39 | Yes | **** |
| CCI + Vehicle vs. CCI + HB-adMSC 3d      | 13.45  | 5.464 to 21.44   | Yes | ***  |
| CCI + Vehicle vs. CCI + HB-adMSC 14d     | -6.843 | -17.16 to 3.472  | No  | ns   |
| CCI + HB-adMSC 3d vs. CCI + HB-adMSC 14d | -20.3  | -31.60 to -8.997 | Yes | ***  |

| %CD163                                   |            |                   |              |         |
|------------------------------------------|------------|-------------------|--------------|---------|
| Number of families                       | 2          |                   |              |         |
| Number of comparisons per family         | 6          |                   |              |         |
| Alpha                                    | 0.05       |                   |              |         |
|                                          |            |                   |              |         |
| Tukey's multiple comparisons test        | Mean Diff. | 95% CI of diff.   | Significant? | Summary |
| Ipsilateral                              |            |                   |              |         |
| Sham + Vehicle vs. CCI + Vehicle         | -100.8     | -117.8 to -83.91  | Yes          | ****    |
| Sham + Vehicle vs. CCI + HB-adMSC 3d     | 54.17      | 33.45 to 74.90    | Yes          | ****    |
| Sham + Vehicle vs. CCI + HB-adMSC 14d    | -74.79     | -101.5 to -48.03  | Yes          | ****    |
| CCI + Vehicle vs. CCI + HB-adMSC 3d      | 155        | 134.3 to 175.7    | Yes          | ****    |
| CCI + Vehicle vs. CCI + HB-adMSC 14d     | 26.05      | -0.7092 to 52.80  | No           | ns      |
| CCI + HB-adMSC 3d vs. CCI + HB-adMSC 14d | -129       | -158.3 to -99.65  | Yes          | ****    |
| Contralateral                            |            |                   |              |         |
| Sham + Vehicle vs. CCI + Vehicle         | 50.69      | 33.77 to 67.61    | Yes          | ****    |
| Sham + Vehicle vs. CCI + HB-adMSC 3d     | 148.2      | 127.4 to 168.9    | Yes          | ****    |
| Sham + Vehicle vs. CCI + HB-adMSC 14d    | 118.2      | 91.49 to 145.0    | Yes          | ****    |
| CCI + Vehicle vs. CCI + HB-adMSC 3d      | 97.48      | 76.75 to 118.2    | Yes          | ****    |
| CCI + Vehicle vs. CCI + HB-adMSC 14d     | 67.55      | 40.80 to 94.30    | Yes          | ****    |
| CCI + HB-adMSC 3d vs. CCI + HB-adMSC 14d | -29.93     | -59.24 to -0.6194 | Yes          | *       |

| CD163/CD32                               |            |                  |              |         |
|------------------------------------------|------------|------------------|--------------|---------|
| Number of families                       | 2          |                  |              |         |
| Number of comparisons per family         | 6          |                  |              |         |
| Alpha                                    | 0.05       |                  |              |         |
|                                          |            |                  |              |         |
| Tukey's multiple comparisons test        | Mean Diff. | 95% CI of diff.  | Significant? | Summary |
| Ipsilateral                              |            |                  |              |         |
| Sham + Vehicle vs. CCI + Vehicle         | 1.742      | -6.080 to 9.565  | No           | ns      |
| Sham + Vehicle vs. CCI + HB-adMSC 3d     | 27.2       | 17.62 to 36.78   | Yes          | ****    |
| Sham + Vehicle vs. CCI + HB-adMSC 14d    | -36.34     | -48.71 to -23.97 | Yes          | ****    |
| CCI + Vehicle vs. CCI + HB-adMSC 3d      | 25.46      | 15.88 to 35.04   | Yes          | ****    |
| CCI + Vehicle vs. CCI + HB-adMSC 14d     | -38.08     | -50.45 to -25.72 | Yes          | ****    |
| CCI + HB-adMSC 3d vs. CCI + HB-adMSC 14d | -63.54     | -77.09 to -49.99 | Yes          | ****    |
| Contralateral                            |            |                  |              |         |

|                                          |        |                  |     |      |
|------------------------------------------|--------|------------------|-----|------|
| Sham + Vehicle vs. CCI + Vehicle         | 3.33   | -4.492 to 11.15  | No  | ns   |
| Sham + Vehicle vs. CCI + HB-adMSC 3d     | 40.29  | 30.71 to 49.87   | Yes | **** |
| Sham + Vehicle vs. CCI + HB-adMSC 14d    | -37    | -49.37 to -24.63 | Yes | **** |
| CCI + Vehicle vs. CCI + HB-adMSC 3d      | 36.96  | 27.38 to 46.54   | Yes | **** |
| CCI + Vehicle vs. CCI + HB-adMSC 14d     | -40.33 | -52.70 to -27.96 | Yes | **** |
| CCI + HB-adMSC 3d vs. CCI + HB-adMSC 14d | -77.29 | -90.84 to -63.74 | Yes | **** |
